# Supplementary material for: Comparative study of thermally activated delayed fluorescent properties of donor–acceptor and donor–acceptor–donor architectures based on phenoxazine and dibenzo[a,j]phenazine
Source: publisher site journal article supplement (doi:10.3762/bjoc.18.48), 2022-04-25
Supplement: Additional file 1 [file 1860-5397-18-48-S1.pdf]

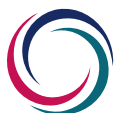

## Supporting Information

for

### **Comparative study of thermally activated delayed fluorescent properties of donor–acceptor and donor–acceptor–donor architectures based on phenoxazine and dibenzo[*a,j*]phenazine**

Saika Izumi, Prasannamani Govindharaj, Anna Drewniak, Paola Zimmermann Crocomo, Satoshi Minakata, Leonardo Evaristo de Sousa, Piotr de Silva, Przemyslaw Data and Youhei Takeda

*Beilstein J. Org. Chem.* **2022**, *18*, 459–468. doi:10.3762/bjoc.18.48

**General information, synthetic procedures, spectral data, photophysical data, and theoretical calculation data**

## **Table of contents**

|                                                                    |       |
|--------------------------------------------------------------------|-------|
| General remarks .....                                              | S1    |
| Synthetic procedures and spectroscopic data of new compounds ..... | S2    |
| Additional spectroscopic analysis .....                            | S3    |
| Thermogravimetric analysis .....                                   | S4    |
| Electrochemical analysis .....                                     | S4    |
| Copies of NMR spectra .....                                        | S5    |
| Theoretical calculations .....                                     | S6–S9 |
| References .....                                                   | S10   |

**General remarks.** All reactions were carried out under an atmosphere of nitrogen unless otherwise noted. Products were purified by chromatography on silica gel Chromatorex NH (Fuji Silysia Chemical Ltd.). Analytical thin-layer chromatography (TLC) was performed on pre-coated silica gel glass plates (Fuji Silysia Chromatorex NH, 0.25 mm thickness). Compounds were visualized under UV light. Melting points were determined on a Stanford Research Systems MPA100 OptiMelt Automated Melting Point System or a DSC 6220 (SII) system. All  $^1\text{H}$  and  $^{13}\text{C}$  NMR spectra were recorded on a JEOL JMTC-400/54/SS Spectrometer ( $^1\text{H}$  NMR, 400 MHz;  $^{13}\text{C}$  NMR, 100 MHz) using tetramethylsilane as an internal standard. Infrared spectra were acquired on a SHIMADZU IRAffinity-1 FT-IR Spectrometer. Mass spectra and high-resolution mass spectra were obtained on a JEOL JMS-700 Mass Spectrometer. The elemental analysis (CHN) was carried out with a JM10 (J-SCIENCE LAB CO., Ltd). UV–vis spectra were recorded on a Shimadzu UV-2550 spectrophotometer. Steady-state emission spectra were recorded on a HAMAMATSU C11347-01 spectrometer with an integrating sphere. Thermogravimetric analysis (TGA) was performed with TG/DTA-7200 system (SII Nano Technology Inc.).

**Materials.** Dehydrated 1,4-dioxane was used as received. Dibenzo[*a,j*]phenazin-3-yl trifluoromethanesulfonate [CAS No. 2409482-67-1]<sup>S1</sup> was synthesized according to the reported procedure. Solvents of fluorescence spectroscopic grade for measurement of UV–vis and emission spectra were purchased from Nacalai Tesque Inc.

**Steady-state UV–vis absorption and PL spectra.** All the steady-state UV–vis absorption and PL spectra were measured at room temperature with diluted solutions ( $10^{-5}$  M) except for saturated cyclohexane solution ( $c$  is less than  $10^{-6}$  M, due to the poor solubility of the material in cyclohexane), which were prepared from degassed spectroscopic grade solvents ( $\text{N}_2$  for 30 min).

## Synthetic procedures and spectroscopic data of new compounds.

### Synthesis of 10-(dibenzo[*a,j*]phenazin-3-yl)-10*H*-phenoxazine (**1**).

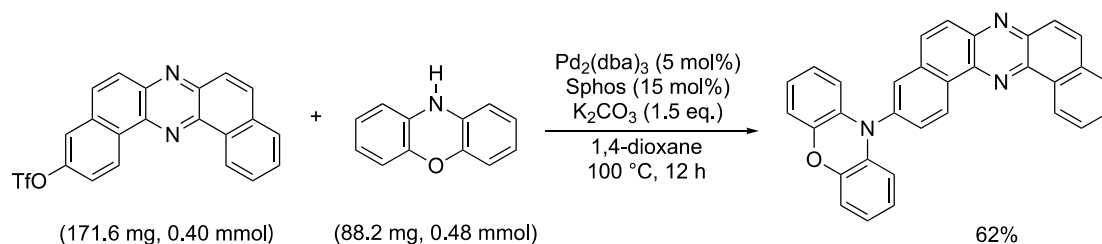

Dehydrated 1,4-dioxane was degassed through freeze-pump-thaw cycling for 3 times before use. A two-necked reaction tube (10 mL) equipped with a magnetic stirring bar, a rubber septum, and a glass stopper was flame-dried under reduced pressure and then purged with N<sub>2</sub> gas for 3 times. To the tube, were added dibenzo[*a,j*]phenazin-3-yl trifluoromethanesulfonate (171.6 mg, 0.40 mmol), phenoxazine (88.2 mg, 0.48 mmol, 2.2 equiv), Pd<sub>2</sub>(dba)<sub>3</sub> (18.3 mg, 20 μmol, 5.0 mol %), SPhos (24.8 mg, 60 μmol, 15 mol %), K<sub>2</sub>CO<sub>3</sub> (83.4 mg, 0.60 mmol, 1.5 equiv), and 1,4-dioxane (3 mL) under a stream of N<sub>2</sub> gas, and the mixture was stirred on an aluminum heating block set at 100 °C for 12 hours. After the mixture was allowed to cool to room temperature, water (5 mL) was added to the reaction mixture, which was extracted with CHCl<sub>3</sub> (20 mL × 3). The combined organic extracts were dried over Na<sub>2</sub>SO<sub>4</sub>, and the solvent was removed under reduced pressure to give the crude product. The crude product was purified by flash column chromatography on NH silica gel (eluent: *n*-hexane/EtOAc 10:0–8:2, then CHCl<sub>3</sub>). The resulting solid was reprecipitated from CHCl<sub>3</sub>/MeOH to give the title compound as red-brown solid in 62% yield (114.3 mg, 0.25 mmol). mp 331 °C (dec.); *R*<sub>f</sub> 0.40 (*n*-hexane/EtOAc 8:2, NH silica); <sup>1</sup>H NMR (400 MHz, CDCl<sub>3</sub>) δ 9.86 (d, *J* = 8.4 Hz, 1H), 9.65 (d, *J* = 7.2 Hz, 1H), 8.18–8.10 (m, 4H), 8.02–8.01 (m, 2H), 7.89–7.82 (m, 3H), 6.76 (dd, *J* = 7.6, 1.2 Hz, 2H), 6.69 (ddd, *J* = 7.6, 7.6, 1.2 Hz, 2H), 6.56 (ddd, *J* = 7.6, 7.6, 1.2 Hz, 2H), 6.03 (dd, *J* = 7.6, 1.2 Hz, 2H); <sup>13</sup>C NMR (100 MHz, CDCl<sub>3</sub>) δ 144.0, 143.2, 142.9, 140.9, 140.0, 139.8, 135.3, 134.3, 133.4, 132.9, 131.6, 131.2, 131.1, 130.2, 129.9, 129.6, 128.5, 128.2, 128.0, 127.9, 126.9, 125.2, 124.4, 121.6, 115.6, 113.4; IR (ATR, cm<sup>-1</sup>): 3047, 1593, 1487, 1332, 1292, 1271, 846, 796, 746, 723, 700; MS (FAB<sup>+</sup>): *m/z* (relative intensity, %): 462 ([M+1]<sup>+</sup>, 37), 461 (M<sup>+</sup>, 100), 271 ([C<sub>12</sub>H<sub>8</sub>NO]<sup>+</sup>, 32); HRMS (FAB<sup>+</sup>): *m/z* calcd for C<sub>32</sub>H<sub>19</sub>N<sub>3</sub>O (M) 461.1528, found 461.1525; Anal. Calcd for C<sub>32</sub>H<sub>19</sub>N<sub>3</sub>O: C, 83.28; H, 4.15; N, 9.10. found: C, 83.08; H, 3.91; N, 8.91.

### Additional spectroscopic analysis.

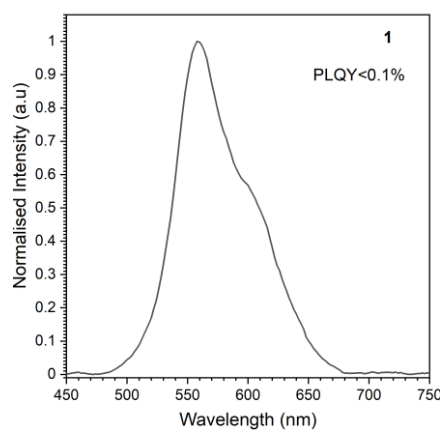

**Figure S1:** Solid-state PL spectrum of **1**.

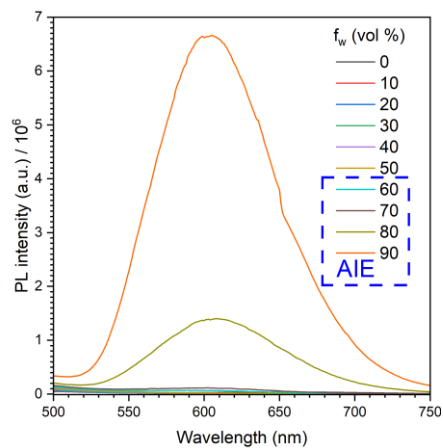

**Figure S2:** Emission spectra ( $\lambda_{ex} = 355$  nm) of 100  $\mu$ M **1** in different THF/water ratio blends.

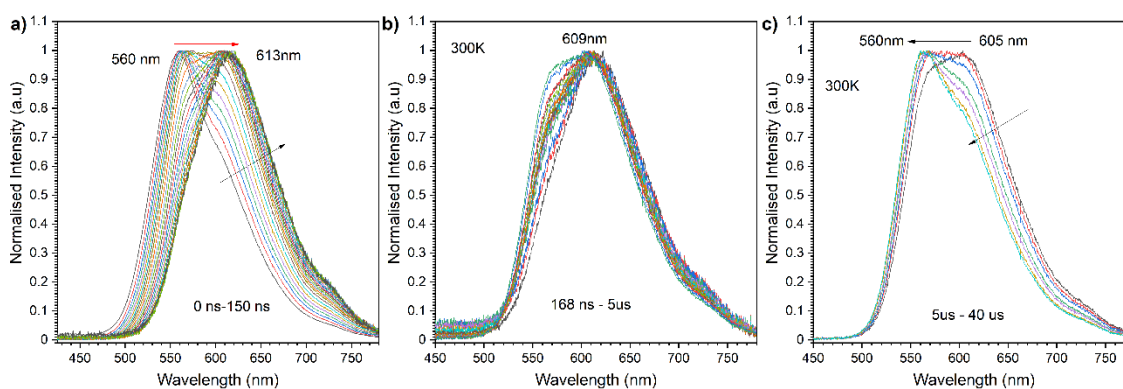

**Figure S3:** Time-resolved photoluminescence (PL) spectra of **1** in CBP with the delayed time.

### Thermogravimetric analysis (TGA).

The TGA profiles of **1** were acquired using a Pt pan under air or N<sub>2</sub> gas flow (200 mL/min), starting from 40 °C to 1000 °C at a ramp rate of 10 °C/min.

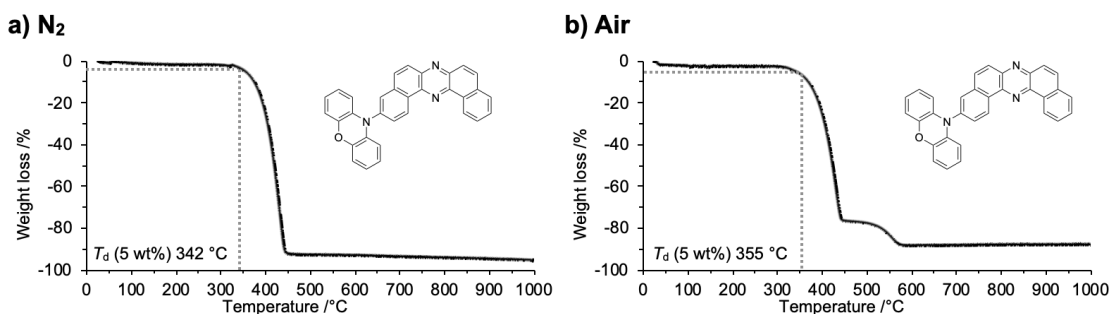

**Figure S4:** TGA profiles of compound **1** under a) N<sub>2</sub> gas flow and b) air.

### Electrochemical analysis.

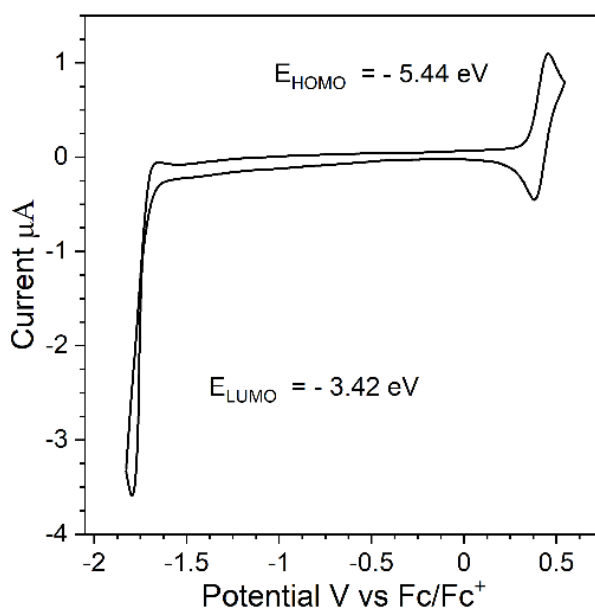

**Figure S5:** CV of 1 mM of **1** in 0.1 M Bu<sub>4</sub>NBF<sub>4</sub> in DCM electrolyte at a scan rate of 50 mV/s.

# Copies of NMR spectra.

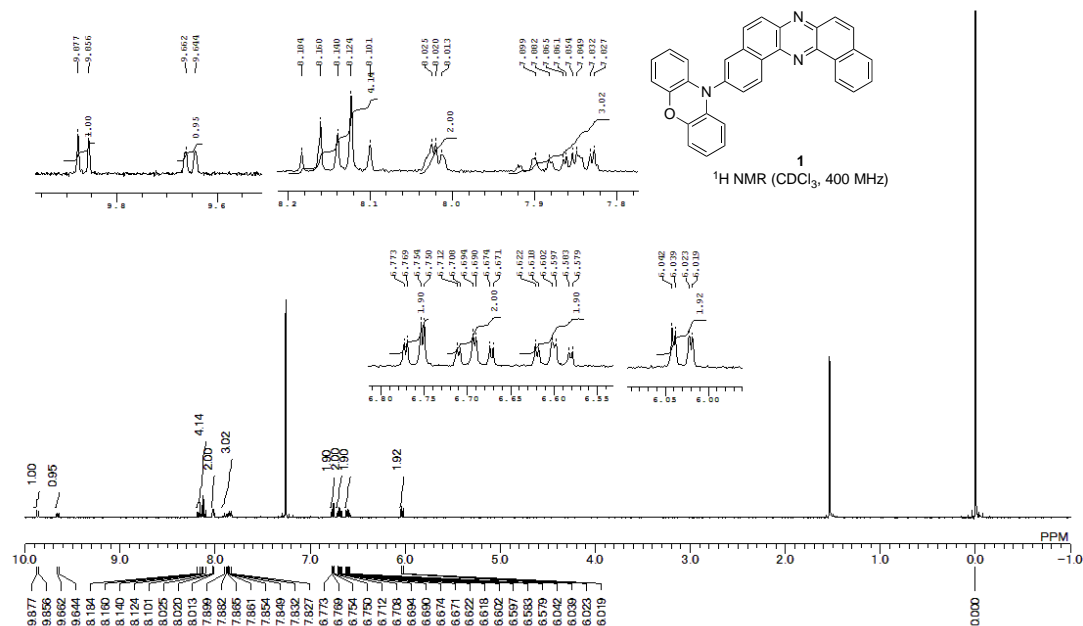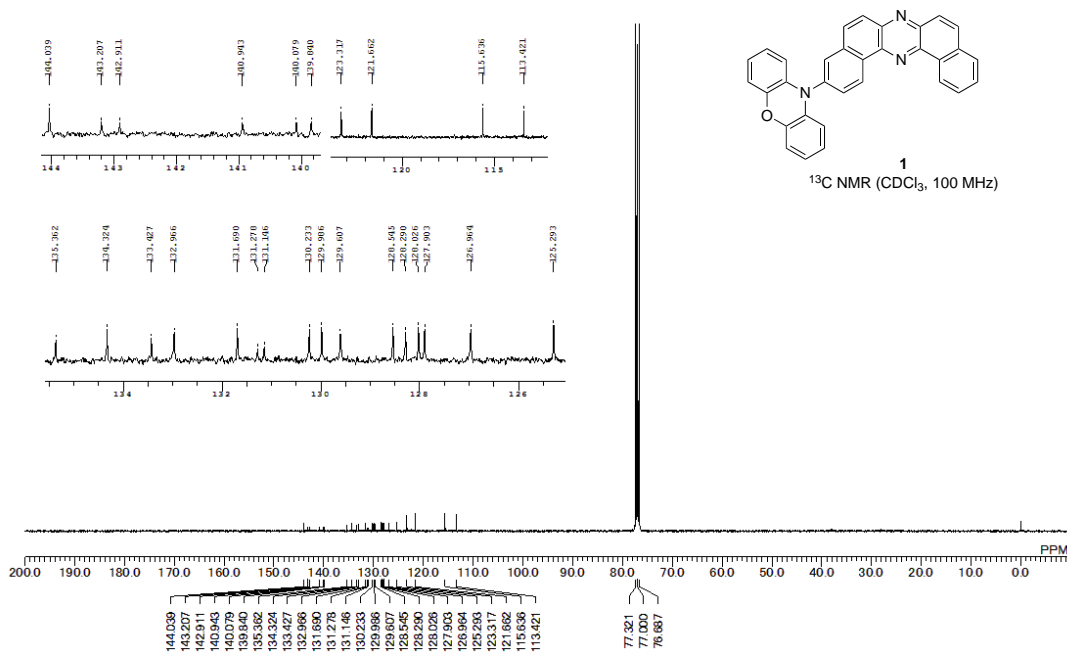

### Theoretical calculations.

Fluorescence, phosphorescence, and ISC rates were estimated with the nuclear ensemble method, as implemented in the NEMO software interfaced with QChem 5.0. A total of 500 geometries were sampled taking as starting point the optimized geometries of the DA and DAD compounds at either  $S_1$ ,  $T_1$ , or  $T_2$  states.

### Functional tuning

**Table S1:** Tuned values of the long-range separation parameter for the different compounds.

| Compound         | $\omega$ (bohr <sup>-1</sup> ) |
|------------------|--------------------------------|
| <b>1</b>         | 0.191                          |
| <b>POZ-DBPHZ</b> | 0.181                          |

### Fluorescence simulations

**Table S2:** Calculated fluorescence rates in toluene for the 2 compounds in their preferred conformation in the  $S_1$  state.

| Compound         | Rate (s <sup>-1</sup> ) | Error (s <sup>-1</sup> ) |
|------------------|-------------------------|--------------------------|
| <b>1</b>         | 2.2E+07                 | 0.6E+07                  |
| <b>POZ-DBPHZ</b> | 1.8E+07                 | 0.6E+07                  |

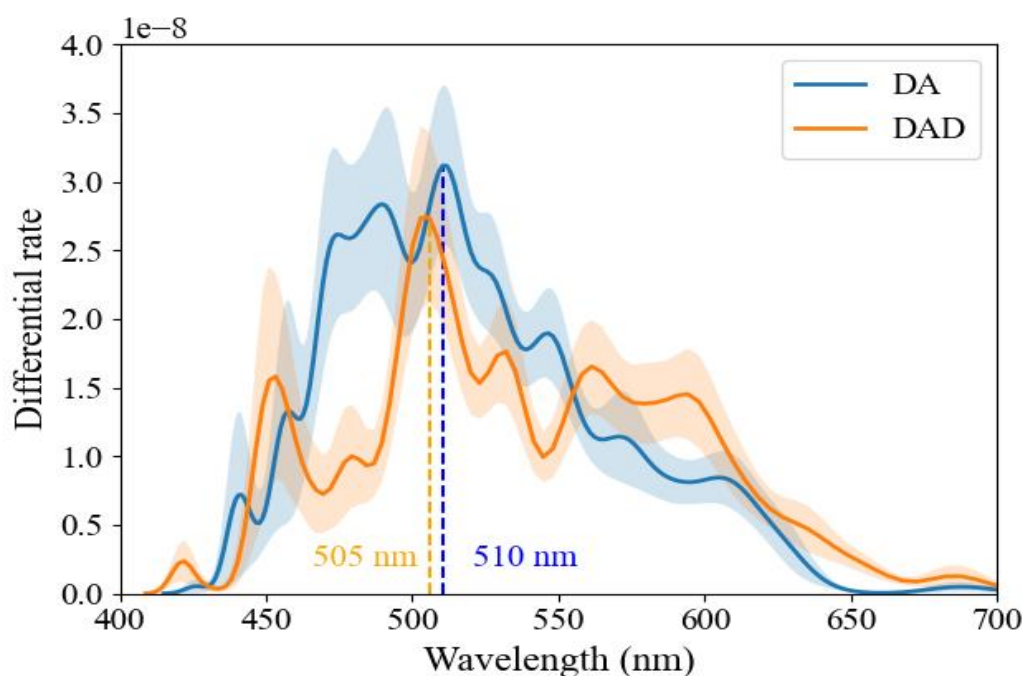

**Figure S6:** Simulated fluorescence spectra for the two compounds. The shadowed region marks the calculated uncertainty.



## Phosphorescence simulations

**Table S3:** Calculated  $T_1$  and  $T_2$  phosphorescence rates in toluene for the 2 compounds in their preferred conformation in the  $T_1$  state.

| Compound/State   | $T_1$             |                    | $T_2$             |                    |
|------------------|-------------------|--------------------|-------------------|--------------------|
|                  | Rate ( $s^{-1}$ ) | Error ( $s^{-1}$ ) | Rate ( $s^{-1}$ ) | Error ( $s^{-1}$ ) |
| <b>1</b>         | 9.1E+00           | 6.6E+00            | 2.0E+04           | 2.6E+04            |
| <b>POZ-DBPHZ</b> | 3.7E+01           | 6.5E+01            | 9E+04             | 16E+04             |

## Intersystem crossing rates

**Table S4:** Calculated reorganization energies used in the ISC calculations for singlet-to-triplet and triplet-to-singlet transitions.

| Compound         | S $\rightarrow$ T (eV) | T $\rightarrow$ S (eV) |
|------------------|------------------------|------------------------|
| <b>1</b>         | 0.281                  | 0.366                  |
| <b>POZ-DBPHZ</b> | 0.022                  | 0.359                  |

**Table S5:** Estimated ISC rates from the  $S_1$  state for the 2 compounds.

| ISC                   | <b>1</b>          |                    | <b>POZ-DBPHZ</b>  |                    |
|-----------------------|-------------------|--------------------|-------------------|--------------------|
|                       | Rate ( $s^{-1}$ ) | Error ( $s^{-1}$ ) | Rate ( $s^{-1}$ ) | Error ( $s^{-1}$ ) |
| $S_1 \rightarrow T_1$ | 3.8E+08           | 0.5E+08            | 2.4E+08           | 1.2E+08            |
| $S_1 \rightarrow T_2$ | 5.0E+08           | 1.8E+08            | 8.5E+07           | 2.5E+07            |
| $S_1 \rightarrow T_3$ | 2.1E+08           | 1.2E+08            | 9.5E+07           | 4.9E+07            |
| $S_1 \rightarrow T_4$ | 4.9E+07           | 2.5E+07            | 4.8E+07           | 3.5E+07            |
| $S_1 \rightarrow T_5$ | 7.8E+06           | 4.4E+06            | 8.6E+06           | 3.4E+06            |

**Table S6:** Estimated ISC rates from the T<sub>1</sub> state for the 2 compounds.

| ISC                             | <b>1</b>                |                          | <b>POZ-DBPHZ</b>        |                          |
|---------------------------------|-------------------------|--------------------------|-------------------------|--------------------------|
| Transfer                        | Rate (s <sup>-1</sup> ) | Error (s <sup>-1</sup> ) | Rate (s <sup>-1</sup> ) | Error (s <sup>-1</sup> ) |
| T <sub>1</sub> ->S <sub>1</sub> | 1.8E+04                 | 1.0E+04                  | 3.9E+05                 | 1.3E+05                  |
| T <sub>1</sub> ->S <sub>2</sub> | 7.1E+01                 | 6.8E+01                  | 2.5E+04                 | 0.8E+04                  |
| T <sub>1</sub> ->S <sub>3</sub> | 2.3E-02                 | 2.3E-02                  | 3.5E+03                 | 3.4E+03                  |
| T <sub>1</sub> ->S <sub>4</sub> | 8.3E-10                 | 3.9E-10                  | 4.6E-01                 | 4.0E-01                  |
| T <sub>1</sub> ->S <sub>5</sub> | 1.5E-14                 | 0.7E-14                  | 2.4E-05                 | 1.4E-05                  |

**Table S7:** Estimated ISC rates from the T<sub>2</sub> state for the 2 compounds.

| ISC                             | <b>1</b>                |                          | <b>POZ-DBPHZ</b>        |                          |
|---------------------------------|-------------------------|--------------------------|-------------------------|--------------------------|
| Transfer                        | Rate (s <sup>-1</sup> ) | Error (s <sup>-1</sup> ) | Rate (s <sup>-1</sup> ) | Error (s <sup>-1</sup> ) |
| T <sub>2</sub> ->S <sub>1</sub> | 9.6E+07                 | 1.8E+07                  | 1.2E+08                 | 0.09E+08                 |
| T <sub>2</sub> ->S <sub>2</sub> | 1.7E+04                 | 1.2E+04                  | 1.5E+07                 | 0.2E+07                  |
| T <sub>2</sub> ->S <sub>3</sub> | 1.3E+02                 | 1.1E+02                  | 5.1E+04                 | 2.6E+04                  |
| T <sub>2</sub> ->S <sub>4</sub> | 9.6E-02                 | 5.1E-02                  | 1.5E+02                 | 0.6E+02                  |
| T <sub>2</sub> ->S <sub>5</sub> | 2.3E-05                 | 1.7E-05                  | 1.3E+00                 | 0.6E+00                  |

**Table S8:** Estimated probabilities for transfers from the S<sub>1</sub>, T<sub>1</sub>, and T<sub>2</sub> states for compound **1**.

| Transfer                        | Probability (%) | Transfer                        | Probability (%) | Transfer                        | Probability (%) |
|---------------------------------|-----------------|---------------------------------|-----------------|---------------------------------|-----------------|
| S <sub>1</sub> ->T <sub>1</sub> | 32.7            | T <sub>1</sub> ->S <sub>1</sub> | 99.5            | T <sub>2</sub> ->S <sub>1</sub> | 100.0           |
| S <sub>1</sub> ->T <sub>2</sub> | 42.3            | T <sub>1</sub> ->S <sub>2</sub> | 0.4             | T <sub>2</sub> ->S <sub>2</sub> | 0.0             |
| S <sub>1</sub> ->T <sub>3</sub> | 18.2            | T <sub>1</sub> ->S <sub>3</sub> | 0.0             | T <sub>2</sub> ->S <sub>3</sub> | 0.0             |
| S <sub>1</sub> ->T <sub>4</sub> | 4.2             | T <sub>1</sub> ->S <sub>4</sub> | 0.0             | T <sub>2</sub> ->S <sub>4</sub> | 0.0             |
| S <sub>1</sub> ->T <sub>5</sub> | 0.7             | T <sub>1</sub> ->S <sub>5</sub> | 0.0             | T <sub>2</sub> ->S <sub>5</sub> | 0.0             |
| S <sub>1</sub> ->S <sub>0</sub> | 1.9             | T <sub>1</sub> ->S <sub>0</sub> | 0.1             | T <sub>2</sub> ->S <sub>0</sub> | 0.0             |

**Table S9:** Estimated probabilities for transfers from the S<sub>1</sub>, T<sub>1</sub>, and T<sub>2</sub> states for compound **POZ-DBPHZ**.

| Transfer                        | Probability (%) | Transfer                        | Probability (%) | Transfer                        | Probability (%) |
|---------------------------------|-----------------|---------------------------------|-----------------|---------------------------------|-----------------|
| S <sub>1</sub> ->T <sub>1</sub> | 48.2            | T <sub>1</sub> ->S <sub>1</sub> | 93.1            | T <sub>2</sub> ->S <sub>1</sub> | 88.4            |
| S <sub>1</sub> ->T <sub>2</sub> | 17.2            | T <sub>1</sub> ->S <sub>2</sub> | 6.1             | T <sub>2</sub> ->S <sub>2</sub> | 11.5            |
| S <sub>1</sub> ->T <sub>3</sub> | 19.4            | T <sub>1</sub> ->S <sub>3</sub> | 0.8             | T <sub>2</sub> ->S <sub>3</sub> | 0.0             |
| S <sub>1</sub> ->T <sub>4</sub> | 9.7             | T <sub>1</sub> ->S <sub>4</sub> | 0.0             | T <sub>2</sub> ->S <sub>4</sub> | 0.0             |
| S <sub>1</sub> ->T <sub>5</sub> | 1.7             | T <sub>1</sub> ->S <sub>5</sub> | 0.0             | T <sub>2</sub> ->S <sub>5</sub> | 0.0             |
| S <sub>1</sub> ->S <sub>0</sub> | 3.7             | T <sub>1</sub> ->S <sub>0</sub> | 0.0             | T <sub>2</sub> ->S <sub>0</sub> | 0.1             |

## References

S1. Izumi, S.; Higginbotham, H. F.; Nyga, A.; Stachelek, P.; Tohnai, N.; Silva, P. de; Data, P.; Takeda, Y.; Minakata, S. *J. Am. Chem. Soc.* **2020**, *142* (3), 1482–1491.
